# Supplementary material for: Bioinformatics Prediction and Experimental Validation Identify a Novel Cuproptosis-Related Gene Signature in Human Synovial Inflammation during Osteoarthritis Progression
Source: MDPI journal article supplement (doi:10.3390/biom13010127), 2023-01-07
Supplement: s1 [file s1]

Table S1 Primers employed in this study

| Gene symbol | Forward primer (5'-3')  | Reverse primer (5'-3')   |
|-------------|-------------------------|--------------------------|
| DBT         | TCTTAAAGGCTGCTTCCTTGG   | ATCAAACCCTGCTCAGTATCCA   |
| DLST        | CTAACAGCAGGAAGGTTGTCATT | CCACCTGACATCTCCCTCTGT    |
| FDX1        | CCACTTTATAAACCGTGATGGTG | ACATGCACCAAAGCCATCAA     |
| LIPT1       | CTCACCAGGTTCAACAAGCAGTT | CCTACCAATTACAACAGAGGGAGA |
